# Supplementary material
Source: HighWire-hosted journal article supplement (http://www.qdcxjkg.com/highwire/filestream/113555/field_highwire_adjunct_files/0/2011-11-29_WEBSITE_materials_ERJ_TEXT.pdf)
Supplement: 2011-11-29_WEBSITE_materials_ERJ_TEXT.pdf [file 2011-11-29_WEBSITE_materials_ERJ_TEXT.pdf]

## *S1 - Methodology of Position paper: Search strategy for identification of studies*

It is debated whether guidelines should be prepared only on the basis of rigorous methodologies [1-3] categorizing the strength of available evidence according to rigid criteria [4;5].

A rigid approach appears particularly difficult to follow when evaluating information on the link between OSA and hypertension, an area in which data from randomized controlled trials of sufficient power and their meta-analyses are still limited. Nonetheless, the writing Committee made a great effort to provide objective recommendations, through extensive retrieval of published data, and by establishing task forces to prepare and discuss separate documents on specific topics (See appendix 1S as supplemental material on the Journal website).

Methodology of data search, Published documents have been identified from the following sources by means of the specified search strategies : Cochrane Library Systematic review, National Library of Medicine's MEDLINE database (from 1966) through use of MESH terms, and Elsevier's EMBASE database (from 1980). An evaluation of reference lists from identified articles to find additional references was also performed. Unpublished documents have also been searched by through consultation of disease-specific websites and by interviewing investigators and experts in the field.

In preparing the Consensus Document, information from existing Guidelines has been also derived. The available material was addressed in a draft document and was reviewed by all the Writing Committee members during a few consensus conferences.

According to the approach followed in preparing the ESH-ESC Hypertension Management Guidelines, also in preparing this Consensus Document the Writing Committee decided not to perform any formal grading of the evidence.

### **Table of contents:**

#### **-Introduction**

#### **-Association of OSA with hypertension, and hypertension with OSA.**

#### **-Mechanisms of increased CV risk in OSA patients**

##### *-Autonomic alterations*

##### *-Altered mechanics of ventilation (Acute physiologic effects of negative intrathoracic pressure)*

##### *-Renin-angiotensin-aldosterone system (RAAS) and sleep apnea*

##### *-Endothelial dysfunction*

*-Inflammation*

*-Metabolic factors*

*-Genetic aspects of hypertension in OSA*

**-Cardiovascular events and organ damage in OSA patients (OSA as a cause of cardiovascular complications).**

*-Ischaemic heart disease.*

*-Sleep apnea and Stroke.*

*-Congestive Heart Failure (CHF).*

*-Target Organ Damage.*

**-Sleep related breathing disorders in patients with cardio and cerebrovascular diseases (SRBD as a consequence of cardiovascular diseases)**

*-CHF*

*-Stroke*

**-Diagnostic aspects**

*-Diagnosing OSA in patients with hypertension.*

*-Diagnosing hypertension in patients with OSA: Assessment of OSA contribution to resistant hypertension*

*-Different types of blood pressure measurements in OSA patients*

**-Management of OSA and associated hypertension**

*-Lifestyle Changes*

*-Choice of antihypertensive drugs in hypertensive patients with OSA*

*-Continuous Positive Airway Pressure (CPAP) Treatment in OSA patients with hypertension*

*-Effects of other specific OSA treatments besides CPAP ( surgical procedures and oral devices) on BP reduction*

## *-Treatment of OSA in patients with CV disease*

### **-Problems and perspectives**

#### **S2 Patient history and questionnaires**

Clinical symptoms suggestive for co-morbid OSA(S) may be divided into daytime and nighttime symptoms ( table 4) [6]. A structured interview or specific questionnaires are particularly helpful in the routine assessment of these clinical features of OSA(S) in patients with arterial hypertension [7;8]. The assessment of increased daytime sleepiness is of particular interest as data indicate that OSA has a stronger impact on blood pressure regulation in patients with concomitant daytime sleepiness and thereby expressing the clinical syndrome termed OSAS [9]. However, it is a difficult task to assess excess daytime sleepiness by simple measures due to the fact that sleepiness may be masked by various coping behaviors or a personal perception of normal or abnormal levels of alertness. One often used and validated tool for the systematic assessment of impaired daytime alertness in the context of OSA is the Epworth Sleepiness Scale [10] (see file S.4 pdf). This questionnaire contains eight questions regarding the occurrence of unintended sleep periods during certain monotonous situations during daily life which have to be answered by the patient. A sum score of >10 out of 24 points indicate a clinically relevant impaired daytime wakefulness. However, a score of 10 points or below does not exclude a relevant impairment of vigilance. An additional method for the assessment of daytime sleepiness is the Multiple Sleep Latency Test (MSLT). The patient undergoes four to five 20 minute periods of quiet bed rest between 8 am and 4 pm with a simultaneous sleep EEG recording and is asked to fall asleep during these periods. The method aims to detect pathologically short latencies for sleep onset as an objective measure of increased daytime sleepiness. A variant of this test is the Multiple Wakefulness Test (MWT). In the MWT patients are asked to stay awake during periods of 40 minutes lying in bed in a dark and quite environment. Both methods are time consuming, costly, and therefore restricted to specific clinical questions. Data from patient's history and physical status alone has been used to predict polysomnographically verified OSA(S). It has been clearly demonstrated that sensitivity and specificity for the daytime assessment of OSA(S) is insufficiently low [7;11].

### **S 3 - Specific Blood Pressure Monitoring data in the general population and in OSA patients**

Most studies in the general population looking at the relationship between SDB and hypertension have used clinic BP measurements [12-15]. In few studies, however, ABPM has also been used. In a small sample of the general population (n= 82) longitudinal observations have been obtained on how measures of SDB may predict changes in 24-h ABPM profile [16]. 24-h mean arterial pressure (MAP) and mean 24-h DBP were each best predicted by change in RDI, explaining 5% of the variance in these 24-h ABP parameters, and by current smoking status. After accounting for these variables, BP was not predicted by any of the other potential confounders. Mean RDI (averaged between t5 and t1) was associated with night-time average MAP and SBP, and by maximal SBP measured during sleep [16].

ABPM has been used in clinical settings to assess BP changes in OSA for more than 15 years [17]. However, the question still under debate is the added value of ABPM compared to clinic measurement in diagnosing HT in OSA.

In a non-selected group of OSA patients, the occurrence of a HT condition was dramatically underestimated by clinic BP measurements [18]. In a small cohort of OSA patients unknown as being hypertensive and without any cardiovascular history or cardiovascular treatment, 42% had clinic hypertension whilst 58% had daytime hypertension and 76% had night-time hypertension, using 24-h ABPM. All patients with daytime hypertension also had night-time hypertension. Overall, 80% were hypertensive either in the clinic or over the 24h based on ABPM data. Diastolic and systo-diastolic hypertension, were the prominent types of hypertension observed both by clinic or ambulatory measurements, particularly in the more severe apneic patients according to AHI [18]. When considering a clinical cohort of OSA patients, ABPM is able to detect a significant number of patients who exhibit normal clinic BP but have high ambulatory BP. This is defined as masked hypertension. Masked HT seems to be associated with significant target organ damage [19;20] and increased rate of cardiovascular events [21]. This has been demonstrated both for treated hypertensive patients in whom, even when using antihypertensive medications, uncontrolled out-of office HT is persistent in presence of controlled office BP, and for untreated subjects in the general population [22]. Thus, masked HT subjects should be considered as a subgroup of patients at high risk for cardiovascular diseases. In OSA, masked hypertension is more prevalent than in the general population. Clinic systolic BP of more than 125 and diastolic BP of more than 83 mmHg are associated with a relative risk of 2.7, and have a 90% positive predictive value, for the occurrence of masked hypertension [23].

**S4 Epworth Sleepiness Scale** : see file pdf

**TABLE S1**

Summary data on randomized controlled trials on the effects of CPAP treatment on blood pressure in OSA patients ordered by duration of CPAP treatment

| Author                            | Type of study                     | CPAP duration | Mean CPAP use                           | Sample size       | AHI at diagnosis                           | NT/HT                                         | BP by:           | Outcome: BP during sleep                                           | Outcome: BP during daytime                           | Comments                                                                                                       |
|-----------------------------------|-----------------------------------|---------------|-----------------------------------------|-------------------|--------------------------------------------|-----------------------------------------------|------------------|--------------------------------------------------------------------|------------------------------------------------------|----------------------------------------------------------------------------------------------------------------|
| Dimsdale et al, 2000 [24]         | sham – effective CPAP             | 1 week        | >5                                      | 39 pts            | RDI 53.6±23 CPAP/ 41.7±25 sham             | CPAP: 15 NT/6 HT; sham 14 NT/4 HT             | ABPM             | ↓ MBP (-5 mmHg) in CPAP group                                      | ↓ MBP in both groups                                 |                                                                                                                |
| Norman et al, 2006 [25]           | CPAP vs placebo vs O2             | 2 wks         | > 6                                     | 46 pts (15-18-13) | 66±29 CPAP; 54±30 placebo; 61±29 O2        | NA                                            | ABPM             | ↓ MBP and SBP only in CPAP group                                   | ↓ MBP and SBP only in CPAP group                     |                                                                                                                |
| Engleman et al, 1996 [26]         | crossover CPAP vs placebo tablets | 3 wks         | 4.3                                     | 13 pts            | 49±9                                       | 8 NT/5 HT (4 treated)                         | ABPM             | 5 pts non-dippers on placebo became dipper on CPAP                 | NA                                                   | Mean BP in 24-h unchanged on CPAP                                                                              |
| Faccenda et al, 2001 [27]         | CPAP vs placebo tablets           | 4 wks         | 3.3 h                                   | 68 pts            | 35 (range 15-129)                          | All NT                                        | ABPM             | ↓ DBP with CPAP between 2 and 10 am                                | No change                                            | Mean 24-h DBP ↓ by 1.5 mmHg; SBP/DBP ↓ in pts with high desat, index; DBP ↓ in pts using CPAP for >3.5 h/night |
| Campos-Rodriguez et al, 2006 [28] | sham – effective CPAP             | 4 wks         | CPAP: 5.0 h; sham: 4.4 h                | 68 pts            | CPAP: 58±25; sham: 59±22                   | All HT on treatment                           | ABPM             | CPAP vs sham: similar BP, trend for increased dipping              | CPAP vs sham: no difference                          | Pts with refractory HT showed similar results on therapeutic CPAP                                              |
| Kohler et al. 2009 [29]           | sham – effective CPAP             | 4 wks         | Sham 3.9 ± 2.5 h. Effective 4.7 ± 2.1 h | 102 pts           | ODI sham 42.7 ± 21.6 effective 41.9 ± 25.4 | Subtherapeutic: HT 25.5% Therapeutic HT 21.6% | ABPM + office BP | BP changes during sleep failed to achieve statistical significance | ↓ SBP e DBP on CPAP, but no differences in office BP | Decreased sympathetic markers and increased BRS after active treatment                                         |
| Pepperell et al, 2002 [30]        | sham – effective CPAP             | 1 month       | 4.7 h                                   | 118 pts           | DI: 37±20                                  | 59 NT/11 HT in each group                     | ABPM             | ↓ MBP (-3 mmHg)                                                    | ↓ MBP (-4 mmHg)                                      | BP MBP ↓ in both NT and HT, especially if CPAP use >5 h and DI>33                                              |

|                           |                                         |                                                    |                          |                                |                                                                                                |                                      |                           |                                                                                                                                |                                                                                                         |                                                                                                                                                                              |
|---------------------------|-----------------------------------------|----------------------------------------------------|--------------------------|--------------------------------|------------------------------------------------------------------------------------------------|--------------------------------------|---------------------------|--------------------------------------------------------------------------------------------------------------------------------|---------------------------------------------------------------------------------------------------------|------------------------------------------------------------------------------------------------------------------------------------------------------------------------------|
| Barbé et al, 2001 [31]    | sham – effective CPAP                   | 6 wks                                              | CPAP: 5 h; sham: 4 h     | 54 pts with ESS $\leq$ 10      | CPAP: 54 $\pm$ 3; sham: 57 $\pm$ 4                                                             | NA                                   | ABPM                      | CPAP vs sham: no difference in BP or dipping status                                                                            | CPAP vs sham: no difference in BP                                                                       | Most pts were NT, number of HT unspecified but treated HT similar in both groups                                                                                             |
| Coughlin et al, 2007 [32] | crossover effective vs. sham CPAP       | 6 wks for each treatment                           | CPAP: 3.9 h; sham: 2.6 h | 34 pts                         | 40 $\pm$ 14                                                                                    | 7 NT/27 HT                           | ABPM                      | NA                                                                                                                             | NA                                                                                                      | ↓ 24-h MBP, SBP, DBP                                                                                                                                                         |
| Cross et al, 2008 [33]    | Crossover effective vs. sham CPAP       | 6 wks for each treatment                           | CPAP: 4.5h; sham: 3.1 h  | 29 pts                         | Desaturators: 63 $\pm$ 5; non-desaturators: 20 $\pm$ 1                                         | NT                                   | Intra-arterial daytime BP | NA                                                                                                                             | CPAP vs sham: no difference in BP                                                                       | Vascular function worse in desaturators; recovery after effective CPAP                                                                                                       |
| Pépin et al. 2010 [34]    | crossover CPAP vs. Valsartan 160 mg/die | 8 wks for each treatment, 4 wks washout in between | 4.8 $\pm$ 2.1            | 23 pts                         | 29 $\pm$ 18                                                                                    | All HT                               | ABPM                      | Valsartan more effective than CPAP                                                                                             | Valsartan more effective than CPAP                                                                      | RCT followed by an open study in 11 pts, treated with both CPAP and Valsartan, with further reduction in BP compared to Valsartan alone                                      |
| Becker et al, 2003 [35]   | sham – effective CPAP                   | 9 wks                                              | 5.5 h                    | 32 pts                         | Pre-CPAP: 64; post: 3 CPAP/ 33 sham                                                            | CPAP: 8 NT/8 HT; sham: 3 NT/ 13 HT   | Portapres                 | ↓ SBP and DBP (-10 mmHg)                                                                                                       | ↓ SBP and DBP (-10 mmHg)                                                                                | Large number of dropouts                                                                                                                                                     |
| Hui et al, 2006 [36]      | sham – effective CPAP                   | 12 wks                                             | 5.1 h CPAP/ 2.6 h sham   | 46 pts                         | CPAP: 33 $\pm$ 3 (SE); sham: 30 $\pm$ 3 (SE)                                                   | CPAP: 11 NT/17 HT; sham: 17 NT/11 HT | ABPM                      | ↓ MBP and SBP only in CPAP group                                                                                               | No change                                                                                               | ↓ 24-h MBP and DBP; trend for larger effect in HT                                                                                                                            |
| Barnes et al, 2004 [37]   | crossover CPAP vs. OA vs. placebo       | 3 months for each treatment                        | CPAP: 3.6 h; OA: 5.5 h   | 110 pts, 80 pts for all 3 arms | 21.5 $\pm$ 2                                                                                   | 94 NT/ 16 HT; 44 nondippers          | ABPM                      | Unchanged BP on CPAP                                                                                                           | Unchanged BP on CPAP                                                                                    | No $\Delta$ in dipping/non-dipping status on CPAP                                                                                                                            |
| Lozano et al. 2010 [38]   | CPAP+HT treatment vs HT treatment alone | 3 months                                           | 5.6 $\pm$ 1.52 h         | 75 pts                         | 52.67 $\pm$ 21.5 conventional treatment: 46.78 $\pm$ 21.43<br>CPAP treatment 59.79 $\pm$ 19.71 | All with resistant HT                | ABPM                      | No difference between CPAP and conventional treatment . in patients with high CPAP compliance (>5.8 h) ↓ nocturnal SBP and DBP | ↓24 h diastolic BP in CPAP group<br><br>in patients with high compliance also ↓ diurnal DBP and 24h SBP | Largest BP decrease in pts using CPAP for >5.8 h/night<br><br>↓ number of non-dipping patients in the CPAP group, no significant changes in the conventional treatment group |

|                                 |                              |          |                                 |                                                     |                      |                                                                                                  |                 |                                               |                                                        |                                                            |
|---------------------------------|------------------------------|----------|---------------------------------|-----------------------------------------------------|----------------------|--------------------------------------------------------------------------------------------------|-----------------|-----------------------------------------------|--------------------------------------------------------|------------------------------------------------------------|
| Duran-Cantolla et al, 2010 [39] | sham – effective CPAP        | 3 months | CPAP: 4.5±1.7 h, Sham 4.2±1.8 h | 340 pts with HT and OSA (AHI>15)                    | 43.5±24.5            | All HT                                                                                           | ABPM            | ↓ MBP, SBP, AND DBP only in CPAP group        | ↓ MBP, SBP, AND DBP only in CPAP group                 | Change in BP statistically significant but small (<3 mmHg) |
| Drager et al, 2011 [40]         | CPAP vs no treatment         | 3 months | 5.2 ± 0.7                       | 36 pts. with pre-HT or masked HT                    | AHI: 56±22           | Pre-HT :control 17%, CPAP 17%. Masked HT: 7% control , 7% CPAP. Nondipping: 6% control, 9% CPAP. | Office BP, ABPM | ↓ nocturnal SBP and DBP at ABPM in CPAP group | ↓ office SBP, ↓ diurnal SBP and DBP at ABPM            |                                                            |
| Barbé et al, 2010 [41]          | CPAP vs no treatment for OSA | L, 1998  | 4.7± 2                          | 359 non-sleepy OSA pts (178 CPAP, 181 conservative) | AHI: 45±20           | All HT                                                                                           | Office BP       | NA                                            | At 3 months, no differences. At 12 months ↓ SBP, ↓ DBP | Largest BP decrease in pts using CPAP for >5.6 h/night     |
| Robinson et al, 2006 [9]        | crossover CPAP vs. sham CPAP | 1 month  | CPAP: 5.2 h; sham: 4.3 h        | 35 pts with ESS≤10                                  | DI: 28 (range 18-38) | 35 HT, 27 on anti-HT treatment                                                                   | ABPM            | CPAP vs sham: no difference                   | CPAP vs sham: no difference                            |                                                            |



## REFERENCES OF STUDIES QUOTED IN SUPPLEMENTAL FILES AND TABLE

### References

1. Mancia G, Zanchetti,A. Evidence-based medicine: an educational instrument or a standard for implementation? *J Hypertens* 1999; 17:1509-10.
2. Mancia G, De,BG, Dominiczak,A et al. 2007 Guidelines for the Management of Arterial Hypertension: The Task Force for the Management of Arterial Hypertension of the European Society of Hypertension (ESH) and of the European Society of Cardiology (ESC). *J Hypertens* 2007; 25:1105-87.
3. Swales JD. Evidence-based medicine and hypertension. *J Hypertens* 1999; 17:1511-6.
4. Last JM AJe. *A dictionary of epidemiology*. 3rd edn. New York, NY: Oxford University Press. 1995.  
Ref Type: Serial (Book,Monograph)
5. Shekelle PG, Woolf,SH, Eccles,M, Grimshaw,J. Clinical guidelines: developing guidelines. *BMJ* 1999; 318:593-6.
6. Redline S, Strohl,KP. Recognition and consequences of obstructive sleep apnea hypopnea syndrome. *Clin Chest Med* 1998; 19:1-19.
7. Collop NA, Anderson,WM, Boehlecke,B et al. Clinical guidelines for the use of unattended portable monitors in the diagnosis of obstructive sleep apnea in adult patients. Portable Monitoring Task Force of the American Academy of Sleep Medicine. *J Clin Sleep Med* 2007; 3:737-47.
8. Netzer NC, Stoohs,RA, Netzer,CM, Clark,K, Strohl,KP. Using the Berlin Questionnaire to identify patients at risk for the sleep apnea syndrome. *Ann Intern Med* 1999; 131:485-91.
9. Robinson GV, Langford,BA, Smith,DM, Stradling,J. Predictors of blood pressure fall with continuous positive airway pressure (CPAP) treatment of obstructive sleep apnoea (OSA). *Thorax* 2008.
10. Johns MW. A new method for measuring daytime sleepiness: the Epworth sleepiness scale. *Sleep* 1991; 14:540-5.
11. Franklin K RNAS. *Obstructive Sleep Apnea – A systematic literature report*. SBU–The Swedish Council on Technology Assessment in Health Care. 1-286. 2007. Ref Type: Serial (Book,Monograph)

12. Bixler EO, Vgontzas,AN, Lin,HM et al. Association of hypertension and sleep-disordered breathing. *Arch Intern Med* 2000; 160:2289-95.
13. Duran J, Esnaola,S, Rubio,R, Iztueta,A. Obstructive sleep apnea-hypopnea and related clinical features in a population-based sample of subjects aged 30 to 70 yr. *Am J Respir Crit Care Med* 2001; 163:685-9.
14. Nieto FJ, Young,TB, Lind,BK et al. Association of sleep-disordered breathing, sleep apnea, and hypertension in a large community-based study. *Sleep Heart Health Study. JAMA* 2000; 283:1829-36.
15. Peppard PE, Young,T, Palta,M, Skatrud,J. Prospective study of the association between sleep-disordered breathing and hypertension. *N Engl J Med* 2000; 342:1378-84.
16. Wright JT, Jr., Redline,S, Taylor,AL et al. Relationship between 24-H blood pressure and sleep disordered breathing in a normotensive community sample. *Am J Hypertens* 2001; 14:743-8.
17. Suzuki M, Otsuka,K, Guilleminault,C. Long-term nasal continuous positive airway pressure administration can normalize hypertension in obstructive sleep apnea patients. *Sleep* 1993; 16:545-9.
18. Baguet JP, Hammer,L, Levy,P et al. Night-time and diastolic hypertension are common and underestimated conditions in newly diagnosed apnoeic patients. *J Hypertens* 2005; 23:521-7.
19. Bjorklund K, Lind,L, Zethelius,B, Andren,B, Lithell,H. Isolated ambulatory hypertension predicts cardiovascular morbidity in elderly men. *Circulation* 2003; 107:1297-302.
20. Liu JE, Roman,MJ, Pini,R, Schwartz,JE, Pickering,TG, Devereux,RB. Cardiac and arterial target organ damage in adults with elevated ambulatory and normal office blood pressure. *Ann Intern Med* 1999; 131:564-72.
21. Bobrie G, Chatellier,G, Genes,N et al. Cardiovascular prognosis of "masked hypertension" detected by blood pressure self-measurement in elderly treated hypertensive patients. *JAMA* 2004; 291:1342-9.
22. Ohkubo T, Kikuya,M, Metoki,H et al. Prognosis of "masked" hypertension and "white-coat" hypertension detected by 24-h ambulatory blood pressure monitoring 10-year follow-up from the Ohasama study. *J Am Coll Cardiol* 2005; 46:508-15.
23. Baguet JP, Levy,P, Barone-Rochette,G et al. Masked hypertension in obstructive sleep apnea syndrome. *J Hypertens* 2008; 26:885-92.

24. Dimsdale JE, Loredó,JS, Profant,J. Effect of continuous positive airway pressure on blood pressure : a placebo trial. *Hypertension* 2000; 35:144-7.
25. Norman D, Loredó,JS, Nelesen,RA et al. Effects of continuous positive airway pressure versus supplemental oxygen on 24-hour ambulatory blood pressure. *Hypertension* 2006; 47:840-5.
26. Engleman HM, Gough,K, Martin,SE, Kingshott,RN, Padfield,PL, Douglas,NJ. Ambulatory blood pressure on and off continuous positive airway pressure therapy for the sleep apnea/hypopnea syndrome: effects in "non-dippers". *Sleep* 1996; 19:378-81.
27. Faccenda JF, Mackay,TW, Boon,NA, Douglas,NJ. Randomized placebo-controlled trial of continuous positive airway pressure on blood pressure in the sleep apnea-hypopnea syndrome. *Am J Respir Crit Care Med* 2001; 163:344-8.
28. Campos-Rodriguez F, Grilo-Reina,A, Perez-Ronchel,J et al. Effect of continuous positive airway pressure on ambulatory BP in patients with sleep apnea and hypertension: a placebo-controlled trial. *Chest* 2006; 129:1459-67.
29. Kohler M, Ayers,L, Pepperell,JC et al. Effects of continuous positive airway pressure on systemic inflammation in patients with moderate to severe obstructive sleep apnoea: a randomised controlled trial. *Thorax* 2009; 64:67-73.
30. Pepperell JC, Ramdassingh-Dow,S, Crosthwaite,N et al. Ambulatory blood pressure after therapeutic and subtherapeutic nasal continuous positive airway pressure for obstructive sleep apnoea: a randomised parallel trial. *Lancet* 2002; 359:204-10.
31. Barbe F, Mayoralas,LR, Duran,J et al. Treatment with continuous positive airway pressure is not effective in patients with sleep apnea but no daytime sleepiness. a randomized, controlled trial. *Ann Intern Med* 2001; 134:1015-23.
32. Coughlin SR, Mawdsley,L, Mugarza,JA, Wilding,JP, Calverley,PM. Cardiovascular and metabolic effects of CPAP in obese males with OSA. *Eur Respir J* 2007; 29:720-7.
33. Cross MD, Vennelle,M, Engleman,HM et al. Comparison of CPAP titration at home or the sleep laboratory in the sleep apnea hypopnea syndrome. *Sleep* 2006; 29:1451-5.
34. Pepin JL, Tamisier,R, Barone-Rochette,G, Launois,SH, Levy,P, Baguet,JP. Comparison of continuous positive airway pressure and valsartan in hypertensive patients with sleep apnea. *Am J Respir Crit Care Med* 2010; 182:954-60.
35. Becker HF, Jerrentrup,A, Ploch,T et al. Effect of nasal continuous positive airway pressure treatment on blood pressure in patients with obstructive sleep apnea. *Circulation* 2003; 107:68-73.

36. Hui DS, To, KW, Ko, FW et al. Nasal CPAP reduces systemic blood pressure in patients with obstructive sleep apnoea and mild sleepiness. *Thorax* 2006; 61:1083-90.
37. Barnes M, McEvoy, RD, Banks, S et al. Efficacy of positive airway pressure and oral appliance in mild to moderate obstructive sleep apnea. *Am J Respir Crit Care Med* 2004; 170:656-64.
38. Lozano L, Tovar, JL, Sampol, G et al. Continuous positive airway pressure treatment in sleep apnea patients with resistant hypertension: a randomized, controlled trial. *J Hypertens* 2010; 28:2161-8.
39. Duran-Cantolla J, Aizpuru, F, Montserrat, JM et al. Continuous positive airway pressure as treatment for systemic hypertension in people with obstructive sleep apnoea: randomised controlled trial. *BMJ* 2010; 341:c5991.
40. Drager LF, Pedrosa, RP, Diniz, PM et al. The effects of continuous positive airway pressure on prehypertension and masked hypertension in men with severe obstructive sleep apnea. *Hypertension* 2011; 57:549-55.
41. Barbe F, Duran-Cantolla, J, Capote, F et al. Long-term effect of continuous positive airway pressure in hypertensive patients with sleep apnea. *Am J Respir Crit Care Med* 2010; 181:718-26.
